# Supplementary material for: Revealing intact neuronal circuitry in centimeter-sized formalin-fixed paraffin-embedded brain
Source: eLife. 2024 May 22;13:RP93212. doi: 10.7554/eLife.93212 (PMC11111220; doi:10.7554/eLife.93212)
Supplement: Supplementary file 1. [file elife-93212-supp1.xlsx]

## Sheet: supplementary file 1a
Supplementary file 1: The antibodies used in the study.
Primary antibodies
Target	Brand	Catalog number	Host	clonality	Immunogen	Amount (for a whole mouse brain)
Calbindin	Cell signaling technology	13176S	Rabbit	Monoclonal	Recombinant protein specific to the amino terminus of human calbindin protein.	10 μg
Choline Acetyltransferase (ChAT)	Millipore	AB144P	Goat	Polyclonal	Human placental enzyme	40 μl
GFP-tag	Abclonal	AE012	Mouse	Monoclonal	Synthetic peptide corresponding to a sequence within amino acids 1-100 to the N-terminus of GFP protein	6 μg
Glial fibrillary acidic protein (GFAP)	abcam	ab7260	Rabbit	Polyclonal	Recombinant full length protein corresponding to Human GFAP	6 μg
Microtubule-associated protein 2 (MAP2)	Cell signaling technology	#8707	Rabbit	Monoclonal	Synthetic peptide corresponding to residues near the carboxy terminus of human MAP2 protein	20 μg
NeuN	Cell signaling technology	24307S	Rabbit	Monoclonal	Recombinant protein specific to the amino terminus of human NeuN protein	20 μl
Pan-axonal filaments (SMI312)	Biolegend	837904	Mouse	Monoclonal	Homogenized hypothalami recovered from Fischer 344 rats	6 μg
Parvalbumin	Invitrogen	PA1933	Rabbit	Polyclonal	Purified parvalbumin from rat skeletal muscle	10 μg
Tyrosine hydroxylase (TH)	Biolegend	818001	Mouse	Monoclonal	Purified Tyrosine Hydroxylase from rat Pheochromocytoma tumor	6 μg
Tryptophen hydroxylase (TPH2)	Invitrogen	PA1778	Rabbit	Polyclonal	Synthetic peptide corresponding to the N-terminal region of TPH2	6 μg
Sencondary antibodies and lectin
Item	Brand	Catalog number	Amount (for a whole mouse brain)
Alexa Fluor® 647 Fab Fragment Donkey Anti-Goat IgG	Jackson ImmunoResearch	705-607-003	1.3 μg
Alexa Fluor® 647 Fab Fragment Donkey Anti-Rabbit IgG	Jackson ImmunoResearch	711-607-003	molar ratio of 1⁰ab : 2⁰ab = 1:2
Alexa Fluor® 647 Fab Fragment Donkey Anti-Mouse IgG	Jackson ImmunoResearch	715-607-003	molar ratio of 1⁰ab : 2⁰ab = 1:2
Rhodamine Red X Fab Fragment Donkey Anti-Rabbit IgG	Jackson ImmunoResearch	711-297-003	molar ratio of 1⁰ab : 2⁰ab = 1:2
Rhodamine Red X Fab Fragment Donkey Anti-Mouse IgG	Jackson ImmunoResearch	715-297-003	molar ratio of 1⁰ab : 2⁰ab = 1:2
Lectin-Dylight 488	Vector Labs	DL-1178-1	40 μl
