# Supplementary material for: Revealing intact neuronal circuitry in centimeter-sized formalin-fixed paraffin-embedded brain
Source: eLife. 2024 May 22;13:RP93212. doi: 10.7554/eLife.93212 (PMC11111220; doi:10.7554/eLife.93212)
Supplement: Supplementary file 2. [file elife-93212-supp2.xlsx]

## Sheet: supplementary file 1b
Supplementary file 2: Abbreviations of brain regions mentioned in Fig. 2B.
	Acronym	Structure name		Acronym	Structure name
	MY-mot	Medulla, motor related		PBG	Parabigeminal nucleus
	MY-sat	Medulla, behavioral state related		PPN	Pedunculopontine nucleus
	MY-sen	Medulla, sensory related		RAmb	Midbrain raphe nuclei
	P-sat	Pons, behavioral state related		SNc	Substantia nigra, compact part
	P-sen	Pons, sensory related		SIM	Simple lobule
	P-mot	Pons, motor related		AN	Ansiform lobule
	ME	Median eminence		PRM	Paramedian lobule
	PVR	Periventricular region		COPY	Copula pyramidis
	PVZ	Periventricular zone		PFL	Paraflocculus
	LZ	Hypothalamic lateral zone		FL	Flocculus
	MEZ	Hypothalamic medial zone		LING	Lingula (I)
	DORpm	Thalamus, polymodal association cortex related		CENT	Central lobule
	DORsm	Thalamus, sensory-motor cortex related		CUL	Culmen
	PRT	Pretectal region		DEC	Declive (VI)
	IV	Trochlear nucleus		FOTU	Folium-tuber vermis (VII)
	MRN	Midbrain reticular nucleus		PYR	Pyramus (VIII)
	RN	Red nucleus		UVU	Uvula (IX)
	AT	Anterior tegmental nucleus		NOD	Nodulus (X)
	RR	Midbrain reticular nucleus, retrorubral area		LSX	Lateral septal complex
	SCm	Superior colliculus, motor related		sAMY	Striatum-like amygdalar nuclei
	III	Oculomotor nucleus		STRd	Striatum dorsal region
	SNr	Substantia nigra, reticular part		STRv	Striatum ventral region
	MA3	Medial accesory oculomotor nucleus		PALc	Pallidum, caudal region
	MT	Medial terminal nucleus of the accessory optic tract		PALd	Pallidum, dorsal region
	Pa4	Paratrochlear nucleus		PALm	Pallidum, medial region
	PN	Paranigral nucleus		PALv	Pallidum, ventral region
	CUN	Cuneiform nucleus		HPF	Hippocampal formation
	LT	Lateral terminal nucleus of the accessory optic tract		Isocortex	Isocortex
	VTA	Ventral tegmental area		OLF	Olfactory areas
	DT	Dorsal terminal nucleus of the accessory optic tract		LA	Lateral amygdalar nucleus
	VTN	Ventral tegmental nucleus		BLA	Basolateral amygdalar nucleus
	PAG	Periaqueductal gray		BMA	Basomedial amygdalar nucleus
	EW	Edinger-Westphal nucleus		CLA	Claustrum
	SAG	Nucleus sagulum		PA	Posterior amygdalar nucleus
	SCs	Superior colliculus, sensory related		EP	Endopiriform nucleus
	IC	Inferior colliculus		VeCB	Vestibulocerebellar nucleus
	MEV	Midbrain trigeminal nucleus		DN	Dentate nucleus
	NB	Nucleus of the brachium of the inferior colliculus		IP	Interposed nucleus
	SCO	Subcommissural organ		FN	Fastigial nucleus
