# Supplementary material for: Revealing intact neuronal circuitry in centimeter-sized formalin-fixed paraffin-embedded brain
Source: eLife. 2024 May 22;13:RP93212. doi: 10.7554/eLife.93212 (PMC11111220; doi:10.7554/eLife.93212)
Supplement: Supplementary file 3. [file elife-93212-supp3.xlsx]

## Sheet: supplementary file 3
Supplementary file 3: The antibody conditions in the multi-round immunolabeling shown in Fig. 3.
	Primary antibody	Secondary antibody	Lectin	Excitation
Round 1	Tyrosine hydroxylase (TH) (Biolegend, 818001), 6 μg	Alexa Fluor® 647 Fab Fragment Donkey Anti-Mouse IgG (Jackson ImmunoResearch, 715-607-003), 4 μg	Lectin-Dylight 488 (Vector Labs, DL-1178-1), 40 μl	Lectin: Ex 488 TH: Ex 642
Round 2	Calbindin (Cell signaling technology, 13176S), 10 ug	Alexa Fluor® 647 Fab Fragment Donkey Anti-Rabbit IgG (Jackson ImmunoResearch, 711-607-003), 6.7 μg	Lectin-Dylight 488 (Vector Labs, DL-1178-1), 40 μl	Lectin: Ex 488 Calbindin: Ex 642
Round 3	Tryptophen hydroxylase (TPH2) (Invitrogen, PA1778), 6 μg	Alexa Fluor® 647 Fab Fragment Donkey Anti-Rabbit IgG (Jackson ImmunoResearch, 711-607-003), 4 μg	Lectin-Dylight 488 (Vector Labs, DL-1178-1), 40 μl	Lectin: Ex 488 TPH2: Ex 642
Round 4	Parvalbumin (Invitrogen, PA1933), 10 μg	Alexa Fluor® 647 Fab Fragment Donkey Anti-Rabbit IgG (Jackson ImmunoResearch, 711-607-003), 6.7 μg	Lectin-Dylight 488 (Vector Labs, DL-1178-1), 40 μl	Lectin: Ex 488 Parvalbumin: Ex 642
Round 5	Choline Acetyltransferase (ChAT) (Millipore, AB144P), 40 μl	Alexa Fluor® 647 Fab Fragment Donkey Anti-Goat IgG (Jackson ImmunoResearch, 705-607-003), 1.3 μg	Lectin-Dylight 488 (Vector Labs, DL-1178-1), 40 μl	Lectin: Ex 488 ChAT: Ex 642
Round 6	Pan-axonal filaments (SMI312) (Biolegend, 837904), 6 μg	Alexa Fluor® 647 Fab Fragment Donkey Anti-Mouse IgG (Jackson ImmunoResearch, 715-607-003), 4 μg	Lectin-Dylight 488 (Vector Labs, DL-1178-1), 40 μl	Lectin: Ex 488 SMI312: Ex 642
